# Supplementary material
Source: Springer Nature journal article supplement (https://www.springermedizin.de/resource/supplementary/12865_2008_252_MOESM1_ESM.pdf/9427608)

**IgA immunoreactivity of celiac disease patients sera to gliadin from different wheat cultivars**

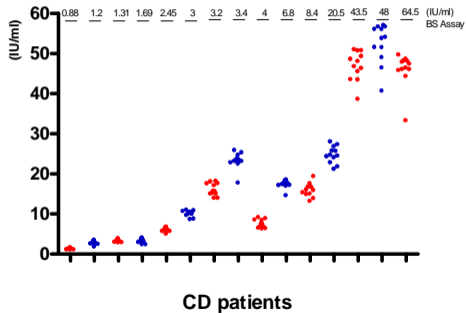

**IgG immunoreactivity of celiac disease patients sera to gliadin from different wheat cultivars**

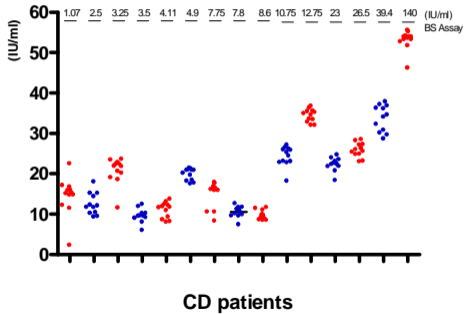

Supplement: MOESM1 [file 9427608]
